# Supplementary material
Source: publisher figshare collection journal article supplement (https://gsajournals.figshare.com/ndownloader/files/28547748)
Supplement: Supplementary file 1 [file 28547748]

## Sheet: Read Me
Supplemental Table 8. Mating type genes and others related to mating that are differentially expressed in a vs. a cells in WT and/or tup1(S649F).
Definition of columns in the tables:
ID = Systematic name
Gene Name = Common name
RNA Expression Summary = Main result from RNA-Seq
Tup1 Binding Summary = Main result from ChIP-Seq
RNA Expression, Log2 Fold Change = Log2 fold change between the samples indicated in each column
ChIP-Seq, Log2 Fold Enrichment = Log2 fold enrichment of Tup1 binding for the indicated strain
Triplicate samples for each genotype were averaged to obtain the numbers in these tables.
Log2 Fold Changes for RNA Expression are highlighted in pink if greater than 2-fold change increased expression.
Log2 Fold Changes for RNA Expression are highlighted in green if greater than 2-fold change decreased expression
ChIP Log2 Fold Enrichments of >0.4 are highlighted in yellow.

## Sheet: Table S8
Table S9. Mating type genes and other mating-related genes that are differentially expressed in a vs. a cells in WT and/or tup1(S649F).
				RNA Expression Summary	Tup1 ChIP Summary		RNA Expression, Log2 Fold Change					Tup1 Occupancy, ChIP Log2 Fold Enrichment
							WT a	tup1(S649F) a	tup1(S649F) a	tup1(S649F) a
	ID	Gene Name	Description				vs. WT a	vs. WT a	vs. WT a	vs. tup1(S649F) a		WT a	WT a	tup1(S649F) a	tup1(S649F) a
a-specific Genes	YGL032C	AGA2	Adhesion subunit of a-agglutinin of a-cells	Repressed in WT a but not tup1(S649F) a	Weak		-4.88733	0.165736	7.5831	2.53003		0.530055	0.537694	-0.00981499	0.431744
	YKL209C	STE6	a-factor membrane transporter	Repressed in WT a but not tup1(S649F) a	a WT only		-4.99643	-0.299791	4.12589	-0.570749		0.212284	0.923698	-0.617033	-0.556332
	YDR461W	MFA1	Mating pheromone a-factor	Repressed in WT a but not tup1(S649F) a	No detectable binding		-5.46588	-0.409358	7.01405	1.95753		#N/A	#N/A	#N/A	#N/A
	YIL015W	BAR1	Protease that inactivates a-factor	Repressed in WT a but not tup1(S649F) a	a WT only		-6.2179	-0.883804	6.45041	1.11631		-0.080172	0.55746	-0.807756	-0.19018
	YFL026W	STE2	Receptor for a-factor pheromone	Repressed in WT a but not tup1(S649F) a	a WT only		-6.50777	-0.0868981	6.39232	-0.0285502		0.510029	-0.315138	-0.198934	-0.13072
	YNL145W	MFA2	Mating pheromone a-factor	Repressed in WT a but not tup1(S649F) a	Lower in a WT		-7.40497	0.825386	8.42552	0.195164		1.96417	0.457472	1.23114	1.48747
a-specific Genes	YPL187W	MF(ALPHA)1	Mating pheromone a-factor	Similar in WT and tup1(S649F)	a only		10.0392	0.529046	0.159611	9.66972		-0.597598	1.04828	-1.08502	0.976043
	YGL089C	MF(ALPHA)2	Mating pheromone a-factor	Higher in tup1(S649F) a than in WT a	Shifted in tup1(S649F) a		9.3523	-0.204337	1.26933	10.826		0.256817	0.508746	-0.783449	0.27197
	YKL178C	STE3	Receptor for a-factor pheromone	Higher in tup1(S649F) a than in WT a	No detectable binding		7.78676	-0.501234	0.72234	9.01033		#N/A	#N/A	#N/A	#N/A
	YLR040C	AFB1	MATa-specific a-factor blocker	Similar in WT and tup1(S649F)	No detectable binding		4.34722	0.255439	0.0512323	4.14301		#N/A	#N/A	#N/A	#N/A
	YJR004C	SAG1	a-agglutinin of a-cells	Higher in tup1(S649F) a than in WT a	tup1(S649F) a only		3.88655	0.170777	2.94341	6.65919		-0.557619	-0.158518	-1.00344	1.90604
	YDL039C	PRM7	Pheromone-regulated protein; predicted transmembrane protein	Higher in tup1(S649F) a than in WT a	See BSC1; single transcript		1.18082	3.50931	2.43395	0.105456		#N/A	#N/A	#N/A	#N/A
	YDL037C	BSC1	Similar to cell surface flocculins	Higher in tup1(S649F) a than in WT a	More in tup1(S649F)		1.44501	3.37796	2.16494	0.231988		2.43779	2.13004	3.17012	2.99387
Other Mating Genes	YBR040W	FIG1	Integral membrane protein required for efficient mating	Higher in tup1(S649F) a than in WT a	No detectable binding		0.442633	-0.0782362	7.72468	8.24555		#N/A	#N/A	#N/A	#N/A
	YNL279W	PRM1	Pheromone-regulated multispanning membrane protein; involved in membrane fusion during mating	Higher in tup1(S649F) a than in WT a	tup1(S649F) a only		0.0887937	-0.321898	6.6655	7.07619		-0.286524	-0.194732	-0.514476	0.494988
	YIL037C	PRM2	Pheromone-regulated protein; required for efficient nuclear fusion	Higher in tup1(S649F) a than in WT a	No detectable binding		-0.189282	-0.296827	6.11987	6.22742		#N/A	#N/A	#N/A	#N/A
	YCR089W	FIG2	Cell wall adhesin, expressed specifically during mating	Higher in tup1(S649F) a than in WT a	No detectable binding		0.154958	0.46536	5.68156	5.37116		#N/A	#N/A	#N/A	#N/A
	YCL027W	FUS1	Membrane protein localized to the shmoo tip; required for cell fusion	Higher in tup1(S649F) a than in WT a	tup1(S649F) a only		0.384021	-1.71275	3.20084	5.29761		-0.500228	-0.417357	-0.894385	2.24766
	YNR044W	AGA1	Anchorage subunit of a-agglutinin of a-cells	Higher in tup1(S649F) a than in WT a	tup1(S649F) a only		0.43268	-0.145698	4.51829	5.09666		-0.493351	-0.299809	-1.02933	0.941551
	YMR232W	FUS2	Cell fusion regulator; cytoplasmic protein localized to shmoo tip; alignment of parental nuclei before nuclear fusion during mating	Higher in tup1(S649F) a than in WT a	No detectable binding		0.00116326	-0.135133	3.44782	3.58411		#N/A	#N/A	#N/A	#N/A
	YCL055W	KAR4	Transcription factor required for response to pheromones	Higher in tup1(S649F) a than in WT a	No detectable binding		-0.0574203	-0.501613	2.46668	2.91088		#N/A	#N/A	#N/A	#N/A
	YGL053W	PRM8	Pheromone-regulated protein; predicted transmembrane protein	Higher in tup1(S649F) a than in WT a	Binding upstream but over tRNA		0.230972	0.143109	2.56366	2.65152		#N/A	#N/A	#N/A	#N/A
	YLR452C	SST2	GTPase-activating protein for Gpa1p; regulates desensitization to alpha factor pheromone	Higher in tup1(S649F) a than in WT a	No detectable binding		0.147007	-0.795324	1.35062	2.29295		#N/A	#N/A	#N/A	#N/A
	YPL156C	PRM4	Pheromone-regulated protein proposed to be involved in mating; predicted transmembrane protein	Higher in tup1(S649F) a than in WT a	Over UTR; more in tup1(S649F)		0.0252549	0.716076	2.95108	2.26025		0.222276	0.295687	0.613803	1.40998
	YMR065W	KAR5	Protein required for nuclear membrane fusion during karyogamy; expression of the gene is regulated by pheromone	Higher in tup1(S649F) a than in WT a	No detectable binding		-0.0927738	-0.139548	2.00264	2.04942		#N/A	#N/A	#N/A	#N/A
	YKL189W	HYM1	Component of the RAM signaling network; localizes to sites of polarized growth during budding and during the mating response	Higher in tup1(S649F) a than in WT a	No detectable binding		0.0936875	-0.0780816	1.40708	1.57885		#N/A	#N/A	#N/A	#N/A
	YMR198W	CIK1	Kinesin-associated protein; required for both karyogamy and mitotic spindle organization	Higher in tup1(S649F) a than in WT a	No detectable binding		-0.0189916	-0.0929748	1.41477	1.48875		#N/A	#N/A	#N/A	#N/A
	YIL117C	PRM5	Pheromone-regulated protein; predicted transmembrane protein	Higher in tup1(S649F) a than in WT a	More in tup1(S649F)		-0.0589177	0.483195	1.87389	1.33178		1.23132	1.19411	1.62232	2.0049
	YBL016W	FUS3	Mitogen-activated serine/threonine protein kinase involved in mating	Higher in tup1(S649F) a than in WT a	tup1(S649F) a only		0.132545	0.113202	1.26934	1.28868		-0.289536	-0.316364	-0.735175	0.710779
	YGR032W	GSC2	Catalytic subunit of 1,3-beta-glucan synthase; involved in formation of the inner layer of the spore wall	Higher in tup1(S649F) a and a (more in a)	tup1(S649F) only		-0.192394	1.86453	3.33122	1.27429		-0.179298	0.0272873	0.448116	0.826784
	YJL157C	FAR1	CDK inhibitor and nuclear anchor; regulated in response to pheromone	Higher in tup1(S649F) a than in WT a	No detectable binding		-0.00733754	-0.0549557	1.08791	1.13553		#N/A	#N/A	#N/A	#N/A
							Log2 Fold Increase >1.0 (2-fold)					Log2 Fold Enrichment > 0.4
							Log2 Fold Decrease <-1.0 (2-fold)
